# Supplementary material for: Functional Significance of Wnt Inhibitory Factor-1 Gene in Kidney Cancer
Source: Oxford University Press journal article supplement (doi:10.1158/0008-5472.can-09-2534), 2009-11-04
Supplement: 00085472can092534-sup-stab_1.pdf [file 00085472can092534-sup-stab_1.pdf]

Table S1. Primer sequences and PCR conditions

|                | Primer sequence (5'-3') | Annealing temperature (°C), PCR cycles | Product size (bp) | Reference  |
|----------------|-------------------------|----------------------------------------|-------------------|------------|
| RT-PCR primers |                         |                                        |                   |            |
| WIF-1-S        | CCGAAATGGAGGCTTTTGTA    | 55, 28                                 | 188               | 19         |
| WIF-1-AS       | TGGTTGAGCAGTTTGCTTTG    |                                        |                   |            |
| GAPDH-S        | CAATGACCCCTTCATTGACC    | 58, 28                                 | 135               | 8          |
| GAPDH-AS       | TGGAAGATGGTGATGGGATT    |                                        |                   |            |
| BSP primers    |                         |                                        |                   |            |
| PAN-S          | GAGTGATGTTTTAGGGGTTT    | 50, 40                                 | 743               | 19         |
| PAN-AS         | TCCATAAATACAAACTCTCCTC  |                                        |                   |            |
| BSP-S          | GTTTTAGGGGTTTTTGAGTGTT  | 50, 40                                 | 551               | this study |
| BSP-AS         | CCATACTACTCAAACCTCCTC   |                                        |                   |            |
